# Supplementary material
Source: PubMed Central journal article supplement (PMC6792367)
Supplement: ehp-127-065001-s001.pdf [file ehp-127-065001-s001.pdf]

**Note to readers with disabilities:** *EHP* strives to ensure that all journal content is accessible to all readers. However, some figures and Supplemental Material published in *EHP* articles may not conform to [508 standards](#) due to the complexity of the information being presented. If you need assistance accessing journal content, please contact [ehp508@niehs.nih.gov](mailto:ehp508@niehs.nih.gov). Our staff will work with you to assess and meet your accessibility needs within 3 working days.

### **Supplemental Material**

#### **Proposed Key Characteristics of Male Reproductive Toxicants as an Approach for Organizing and Evaluating Mechanistic Evidence in Human Health Hazard Assessments**

Xabier Arzuaga, Martyn T. Smith, Catherine F. Gibbons, Niels E. Skakkebaek, Erin E. Yost, Brandiese E. J. Beverly, Andrew K. Hotchkiss, Russ Hauser, Rodrigo L. Pagani, Steven M. Schrader, Lauren Zeise, and Gail S. Prins

#### **Table of Contents**

**Table S1.** Endpoints considered for hazard evaluation of chemical-induced male reproductive effect.

**Table S2.** Example Key Terms Relevant for Identifying Evidence on Chemical-Induced Male reproductive Toxicity.

**Additional File-** Data.zip for Excel table S3

#### **References**

**Table S1: Endpoints considered for hazard evaluation of chemical-induced male reproductive effect**

| <b>Male-specific endpoints of reproductive toxicity<sup>1</sup></b>                             |                                                                                                                                                                                                                                                                                                                                                                                                                                                                                                                                                                                        |
|-------------------------------------------------------------------------------------------------|----------------------------------------------------------------------------------------------------------------------------------------------------------------------------------------------------------------------------------------------------------------------------------------------------------------------------------------------------------------------------------------------------------------------------------------------------------------------------------------------------------------------------------------------------------------------------------------|
| <i>Male-specific endpoints of reproductive toxicity</i>                                         | <i>Description</i>                                                                                                                                                                                                                                                                                                                                                                                                                                                                                                                                                                     |
| Visual examination and histopathology                                                           | Testes, epididymis, seminal vesicles, prostate, pituitary. E.g. in the testis: Sertoli cell only tubules, seminiferous tubule vacuolation, etc. ( <a href="#">U.S.EPA, 1996</a> ; <a href="#">Creasy et al., 2012</a> ; <a href="#">Woldemeskel, 2017</a> ).                                                                                                                                                                                                                                                                                                                           |
| Gross pathology                                                                                 | E.g. absent, small or fluid filled testes, absent, small or infected ventral prostate, dorsolateral prostate, and epididymis, etc. ( <a href="#">Foster and Gray, 2013</a> ).                                                                                                                                                                                                                                                                                                                                                                                                          |
| Sperm evaluation*                                                                               | Alterations in sperm production, number (count) and quality (morphology, motility) ( <a href="#">U.S.EPA, 1996</a> ; <a href="#">Klinefelter, 2015</a> ). Evaluation of functional activity: hyperactivated motility, capacitation/acrosome reaction tests, sperm penetration assay, sperm DNA integrity test ( <a href="#">WHO, 2010</a> ; <a href="#">Sikka and Hellstrom, 2016</a> ; <a href="#">Creasy and Chapin, 2018</a> ).                                                                                                                                                     |
| Developmental effects (i.e. disrupts morphogenesis; promotes structural disorganization)*       | Testis descent (i.e. cryptorchidism)*, absent/small/fluid filled/enlarged testis, preputial separation, sperm production*, anogenital distance*, areola/nipple retention, structure of external genitalia (e.g. hypospadias, epispadias, cleft phallus)*, reproductive organ size/development (e.g. small or absent testes, epididymis, prostate, seminal vesicle and coagulating glands) ( <a href="#">U.S.EPA, 1996</a> ; <a href="#">WHO, 2006</a> ; <a href="#">Skakkebaek et al., 2016</a> ; <a href="#">Thankamony et al., 2016</a> ; <a href="#">Creasy and Chapin, 2018</a> ). |
| Hormone levels*                                                                                 | Disruption of production/secretion of gonadotropin releasing hormone, Luteinizing hormone, follicle stimulating hormone, testosterone, INSL3, inhibin ( <a href="#">U.S.EPA, 1996</a> ; <a href="#">Chapin and Creasy, 2012</a> ; <a href="#">Schrader and Marlow, 2014</a> ).                                                                                                                                                                                                                                                                                                         |
| Sexual behavior/functions*                                                                      | Erection, time periods to first mount, mount with intromission, and first ejaculation, number of mounts with intromission to ejaculation, and the postejaculatory interval ( <a href="#">U.S.EPA, 1996</a> ; <a href="#">Foster and Gray, 2013</a> ).                                                                                                                                                                                                                                                                                                                                  |
| Organ weights                                                                                   | Testes, epididymis, seminal vesicles, prostate, adrenals, levator ani plus bulbocavernosus, glans penis, pituitary ( <a href="#">U.S.EPA, 1996</a> ; <a href="#">Sellers et al., 2007</a> ; <a href="#">Creasy and Chapin, 2018</a> ).                                                                                                                                                                                                                                                                                                                                                 |
| *Reproductive endpoints that can be obtained or estimated relatively noninvasively with humans. |                                                                                                                                                                                                                                                                                                                                                                                                                                                                                                                                                                                        |

Sexual behavior may be disrupted via alterations in endocrine, neural, and reproductive organ interactions. Outcomes that are considered indicative of adverse responses in the male reproductive system “include latency periods to first mount, mount with intromission, and first ejaculation, number of mounts with intromission to ejaculation, and the post ejaculatory interval” ([U.S.EPA, 1996](#)). These types of responses are considered adverse during a hazard evaluation ([U.S.EPA, 1996](#)).

<sup>1</sup> Adapted from U.S.EPA, 1996. Guidelines for reproductive toxicity risk assessment. U.S. Environmental Protection Agency; Risk Assessment Forum, Washington, DC, pp. 25-34.

**Table S2: Example Key Terms Relevant for Identifying Evidence on Chemical-Induced Male reproductive Toxicity**

“male reproductive”[Title/Abstract] OR “reproductive development” [Title/Abstract] OR “endocrine disruptors”[Title/Abstract] OR “environmental chemicals”[Title/Abstract] OR pharmaceuticals[Title/Abstract] OR pesticides[Title/Abstract] OR spermatogenesis[Title/Abstract] OR “Leydig cells”[Title/Abstract] OR “Sertoli cells”[Title/Abstract] OR “germ cells”[Title/Abstract] OR spermatozoa[Title/Abstract] OR testis[Title/Abstract] OR “environmental factors”[Title/Abstract] OR infertility[Title/Abstract] OR sperm[Title/Abstract] OR epididymis[Title/Abstract] OR “hypothalamic-pituitary-gonadal axis”[Title/Abstract] OR “cell signaling”[Title/Abstract] OR androgen[Title/Abstract] OR estrogens[Title/Abstract]) OR Anogenital[Title/Abstract] OR “AGD” [Title/Abstract] OR Azoospermia[Title/Abstract] OR Ejaculation[Title/Abstract] OR “ejaculatory duct” [Title/Abstract] OR Epididymis[Title/Abstract] OR Penis[Title/Abstract] OR “Seminiferous tubules” [Title/Abstract] OR “Sex differentiation” [Title/Abstract] OR “Sexual development” [Title/Abstract] OR Testosterone[MeSH:NoExp] OR “Prenatal Exposure Delayed effects”[MeSH] OR “Environmental Exposure”[MeSH:NoExp] OR “Maternal Exposure”[MeSH] OR “Genital Diseases, male”[MeSH] OR “Genitalia, Male”[MeSH] OR Androgens[MeSH]

The development of a literature search strategy is a key step in the systematic review process. Identifying the key terms that will bring together the body of literature that will be analyzed requires a thoughtful and deliberate search strategy. Systematic reviews typically require the search of multiple databases to capture all studies relevant to the specific research question, and search strategies must be customized to each database. As such, the terms listed above represent key terms that would be relevant when addressing a research question with male toxicity as an outcome of interest. This example list for literature search key terms does not represent an exhaustive search strategy but can provide a starting point for further defining and customizing the strategy specific to the criteria for the systematic review question. In addition, MeSH (Medical Subject Headings), an indexing feature from the National Library of Medicine’s controlled vocabulary thesaurus, can be used to retrieve relevant sources in MEDLINE/PubMED.

## References

- Chapin, R.E., Creasy, D.M., 2012. Assessment of circulating hormones in regulatory toxicity studies II. Male reproductive hormones. *Toxicologic pathology* **40**, 1063-1078.
- Creasy, D., Bube, A., de Rijk, E., Kandori, H., Kuwahara, M., Masson, R., Nolte, T., Reams, R., Regan, K., Rehm, S., Rogerson, P., Whitney, K., 2012. Proliferative and nonproliferative lesions of the rat and mouse male reproductive system. *Toxicologic pathology* **40**, 40S-121S.
- Creasy, D.M., Chapin, R.E., 2018. Male reproductive system. In Wallig, M.A., Haschek, W.M., Rousseaux, C.G., Bolon, B., (Eds.), *Fundamentals of Toxicologic Pathology (Third Edition)*. Academic Press, pp. 459-516.
- Foster, P.M., Gray, L.E., Jr., 2013. Toxic responses of the reproductive system. In Klaassen, C., (Ed.), *Casarett & Doull's Toxicology: The Basic Science of Poisons*. McGraw Hill, pp. 861-906.
- Klinefelter, G.R., 2015. Male Reproductive Toxicology: Environmental Exposures versus Reproductive Competence. In Abou-Donia, M.B., (Ed.), *Mammalian Toxicology*. John Wiley & Sons Ltd, United Kingdom, pp. 473-492.
- Schrader, S.M., Marlow, K.L., 2014. Assessing the reproductive health of men with occupational exposures. *Asian journal of andrology* **16**, 23-30.
- Sellers, R.S., Morton, D., Michael, B., Roome, N., Johnson, J.K., Yano, B.L., Perry, R., Schafer, K., 2007. Society of Toxicologic Pathology position paper: organ weight recommendations for toxicology studies. *Toxicologic pathology* **35**, 751-755.
- Sikka, S.C., Hellstrom, W.J., 2016. Current updates on laboratory techniques for the diagnosis of male reproductive failure. *Asian journal of andrology* **18**, 392-401.
- Skakkebaek, N.E., Rajpert-De Meyts, E., Buck Louis, G.M., Toppari, J., Andersson, A.M., Eisenberg, M.L., Jensen, T.K., Jorgensen, N., Swan, S.H., Sapra, K.J., Ziebe, S., Priskorn, L., Juul, A., 2016. Male reproductive disorders and fertility trends: influences of environment and genetic susceptibility. *Physiological reviews* **96**, 55-97.
- Thankamony, A., Pasterski, V., Ong, K.K., Acerini, C.L., Hughes, I.A., 2016. Anogenital distance as a marker of androgen exposure in humans. *Andrology* **4**, 616-625.
- U.S.EPA, 1996. Guidelines for reproductive toxicity risk assessment. U.S. Environmental Protection Agency; Risk Assessment Forum, Washington, DC, pp. 25-34.
- WHO, 2006. Environmental Health Criteria 237: Principles for Evaluating Health Risks in Children Associated with Exposure to Chemicals. In Safety, I.P.o.C., (Ed.). World Health Organization, Geneva, pp. 198-207.
- WHO, 2010. WHO laboratory manual for the examination and processing of human semen. In Research, D.o.R.H.a., (Ed.). WHO Press, Switzerland, pp.
- Woldemeskel, 2017. Toxicologic pathology of the reproductive system In Gupta, R.C., (Ed.), *Reproductive and Developmental Toxicology*, United Kingdom, pp. 1209-1241.
