# Supplementary material
Source: PubMed Central journal article supplement (PMC6792367)
Supplement: ehp-127-065001-s003.pdf [file ehp-127-065001-s003.pdf]

**Note to readers with disabilities:** *EHP* strives to ensure that all journal content is accessible to all readers. However, some figures and Supplemental Material published in *EHP* articles may not conform to [508 standards](#) due to the complexity of the information being presented. If you need assistance accessing journal content, please contact [ehp508@niehs.nih.gov](mailto:ehp508@niehs.nih.gov). Our staff will work with you to assess and meet your accessibility needs within 3 working days.

### **Supplemental Material**

#### **Proposed Key Characteristics of Male Reproductive Toxicants as an Approach for Organizing and Evaluating Mechanistic Evidence in Human Health Hazard Assessments**

Xabier Arzuaga, Martyn T. Smith, Catherine F. Gibbons, Niels E. Skakkebaek, Erin E. Yost, Brandiese E. J. Beverly, Andrew K. Hotchkiss, Russ Hauser, Rodrigo L. Pagani, Steven M. Schrader, Lauren Zeise, and Gail S. Prins

#### **Table of Contents**

**Table S1.** Endpoints considered for hazard evaluation of chemical-induced male reproductive effect.

**Table S2.** Example Key Terms Relevant for Identifying Evidence on Chemical-Induced Male reproductive Toxicity.

**Additional File-** Data.zip for Excel table S3

#### **References**
